# Supplementary material for: Conditioned Medium from Human Mesenchymal Stromal Cells: Towards the Clinical Translation
Source: PubMed Central journal article supplement (PMC6479925; doi:10.3390/ijms20071656), 2019-04-03
Supplement: ijms-20-01656-s001.pdf [file ijms-20-01656-s001.pdf]

Table S1. Clinical characteristics of patients.

| <b>Characteristics</b>                   | <b>Men</b> | <b>Women</b> |
|------------------------------------------|------------|--------------|
| Number of patients                       | 30         |              |
|                                          | 16         | 14           |
| Age, years                               | 52,8±14,6  |              |
|                                          | 52,2±15,9  | 53,4±12,8    |
| Hypertension, n (%)                      | 13 (43,3%) |              |
| Carbohydrate metabolism disorders, n (%) | 0 (0%)     |              |
| Dyslipidemia, n (%)                      | 0 (0%)     |              |
| Obesity, n (%)                           | 0 (0%)     |              |
| BMI, kg/m <sup>2</sup>                   | 23,4±2,3   |              |
|                                          | 23,1±1,8   | 23,7±2,7     |
| Smoker, n (%)                            | 5 (16,7%)  |              |

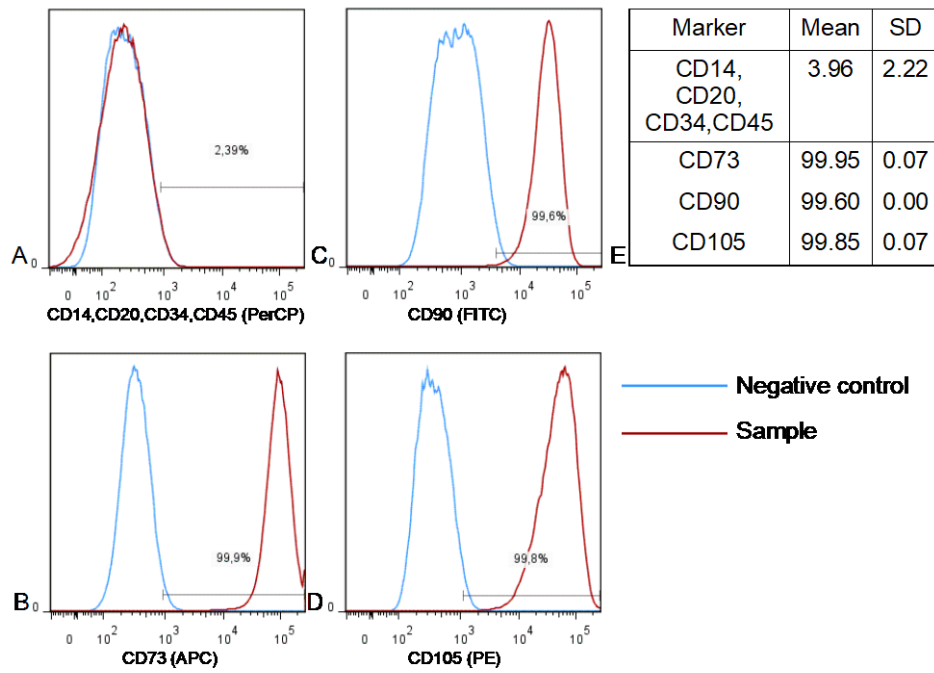

Figure S1. Phenotypic characterization of adipose-derived MSC. Flow cytometric analysis was performed as described in “Materials and Methods”. A – analysis of CD14, CD20, CD34, CD45 expression (PerCP); B – CD73 (APC); C – CD90 (FITC); D – CD105 (PE). E – Average percent and SD of cells stained positive for the markers. The results from 2 donors were presented in the table.

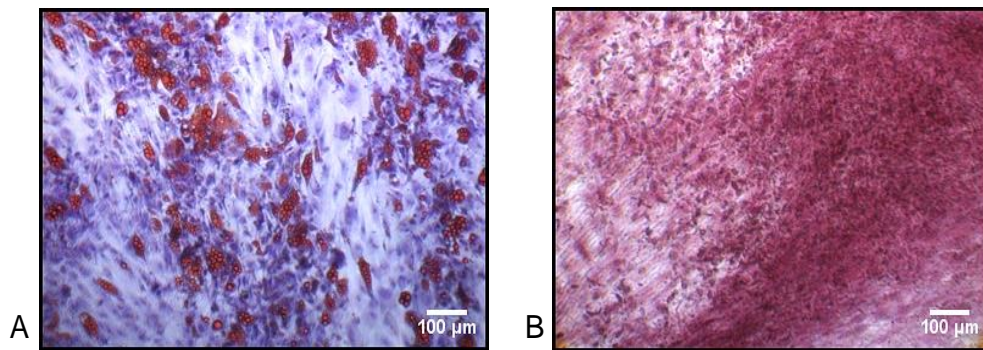

Figure S2. Adipogenic (A) and osteogenic (B) differentiation of human adipose-derived MSC. Scalebars mark 100 μm.
